# Supplementary material for: Autophagy Inhibition Reduces Irradiation-Induced Subcortical White Matter Injury Not by Reducing Inflammation, but by Increasing Mitochondrial Fusion and Inhibiting Mitochondrial Fission
Source: PubMed Central journal article supplement (PMC8857090; doi:10.1007/s12035-021-02653-x), 2021-12-28
Supplement: 12035_2021_2653_MOESM1_ESM.pdf [file 12035_2021_2653_MOESM1_ESM.pdf]

Fig.S1

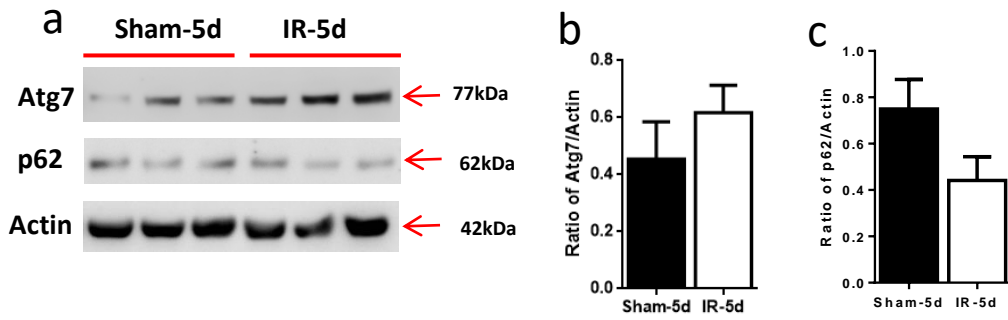

**Fig. S1 The influence of irradiation on autophagy in the wildtype mice.**  
**a** Representative immunoblots of Atg7 and p62 in the wildtype mice under physiological conditions and after irradiation. **b-c.** Quantification of Atg7 or p62 at 5 days after irradiation.

Fig.S2

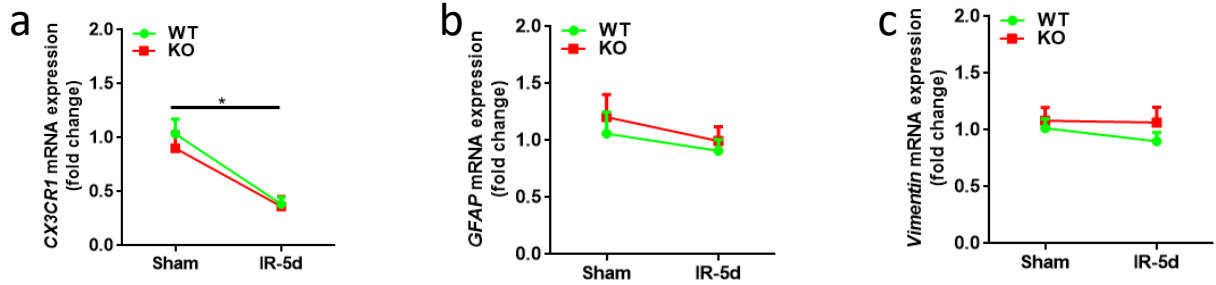

**Fig. S2 The expression of microglia and astrocyte-related genes in the subcortical white matter after irradiation. a.** Bar graph showing the mRNA expression of *CX3CR1* in the cortical tissue including the subcortical white matter at 5 days after irradiation. **b-c.** Bar graphs showing the mRNA expression of *GFAP* and *Vimentin* at 5 days after irradiation.  $n = 5/\text{group}$  for qRT-PCR.  $*p < 0.05$ .

Fig. S3

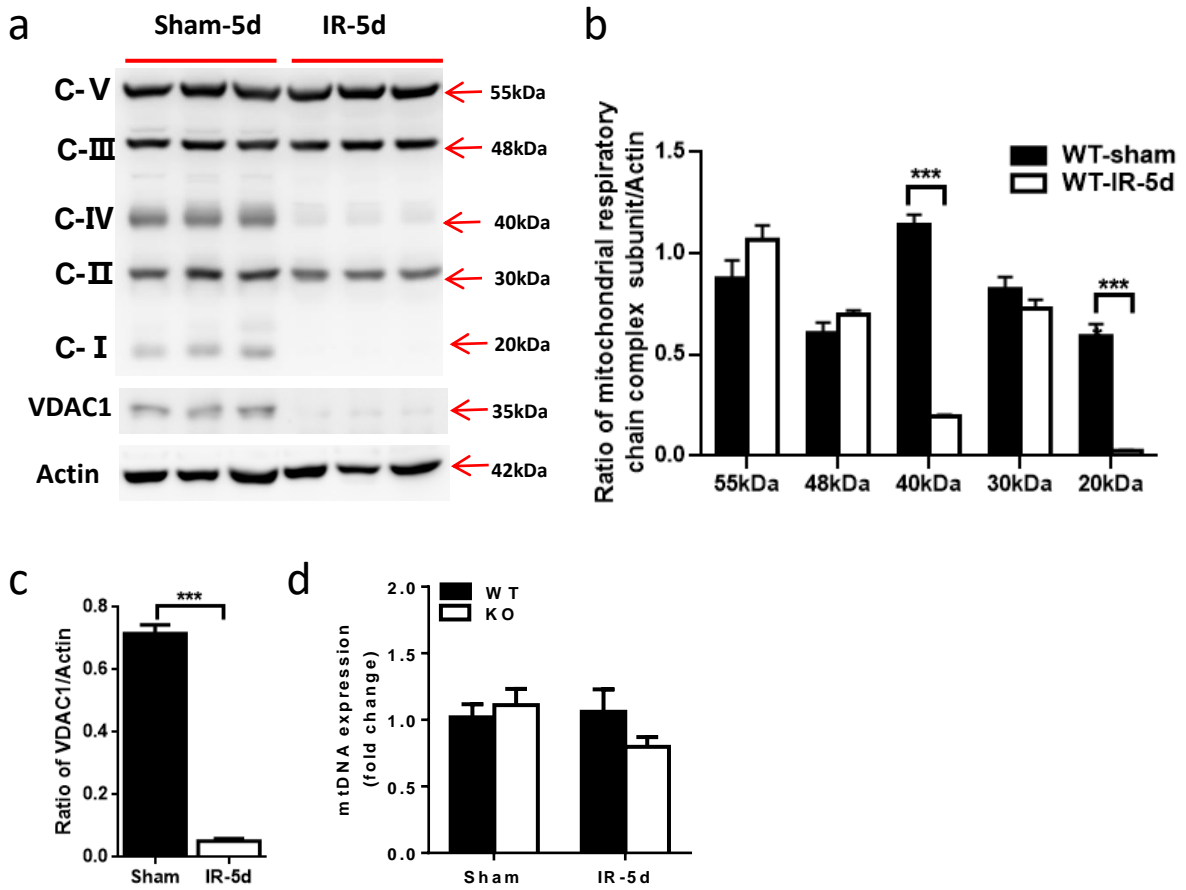

**Fig. S3 Mitochondrial biogenesis after irradiation.** **a.** Immunoblotting of individual respiratory chain complexes (C-I, C-II, C-III, C-IV, C-V) subunits and VDAC1 in the wildtype mice after irradiation. **b-c.** Quantification of respiratory chain complex subunits or VDAC1 at 5 days after irradiation. **d.** mtDNA copy number had no changes at 5 days after irradiation. \*\*\* $p < 0.001$ .

Fig.S4

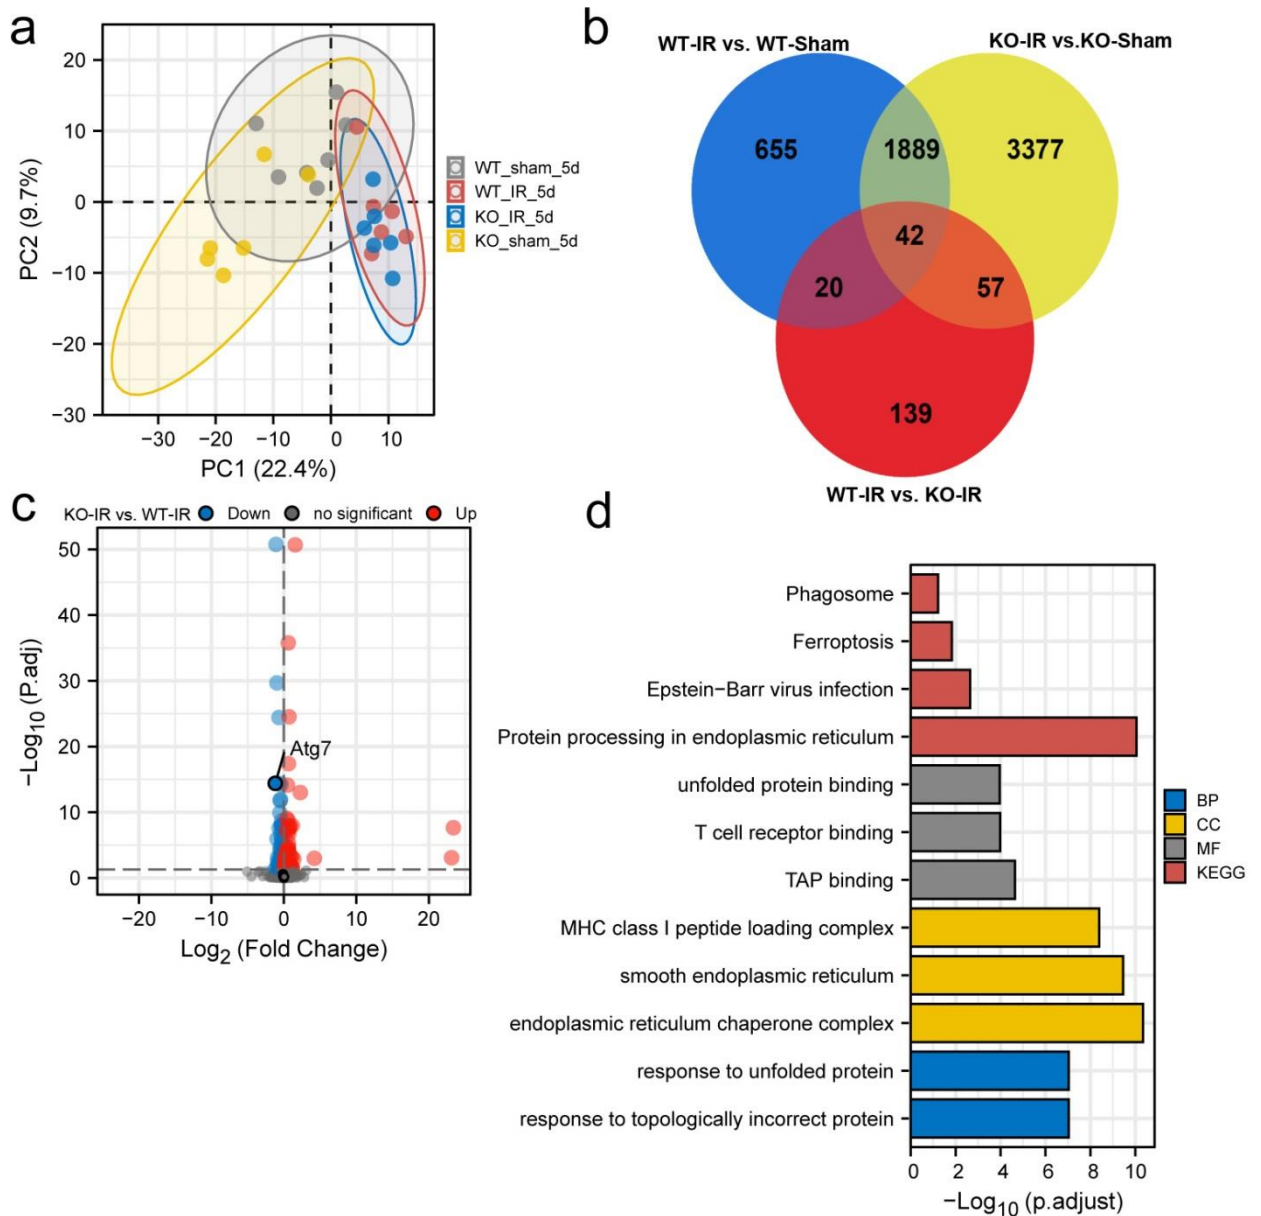

**Fig. S4. The transcriptional levels of Atg7-deficient mice are also quite different from WT mice after brain irradiation. a.** Principal component analysis (PCA) shows similarities between the Atg7 KO and WT mice after irradiation, and brain irradiation became the main factor leading to the differentiation of the four groups. **b.** A Venn diagram showing the number of DEGs in the three comparisons identified by RNA-Seq. **c.** Volcano plot (p-value versus fold change ratio IR-KO/WT) at 5d after brain irradiation, and significantly overexpressed genes are represented as ‘red’ dots and significant down-regulated genes are represented as ‘blue’ dots. **d.** The functions of the differentially expressed genes between Atg7 KO and WT mice after irradiation were predicted using GO and KEGG analyses.
